# Supplementary material for: Can medical face masks be replaced by reusable community face masks with similar performance ? Impact of washing parameters on bacterial filtration efficiency and breathability.
Source: Research Square preprint supplement (doi:10.21203/rs.3.rs-1628693/v1), 2022-05-16
Supplement: Supplementary file 1 [file 128b5c19442a758872040eca.docx]

# SUPPLEMENTARY INFORMATION

| **Trademark** | **Type** | **Reference in article** | **Photo** |
| --- | --- | --- | --- |
| Gyneas (masque en tissue réutilisable) | Community face mask | CFM-A-2L | 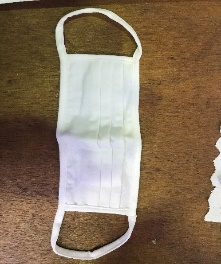 |
| Le Mahieu (Le solidaire) | Community face mask | CFM-B-3L | 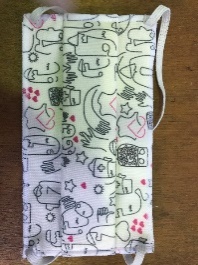 |
| Thuasne (Start Security) | Community face mask | CFM-C-2L | 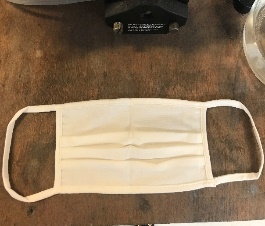 |
| Hero Lab (J17P75) | Community face mask | CFM-D-3L | 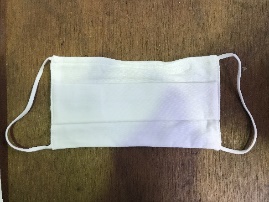 |
| Dim (masque barrière) | Community face mask | CFM-E-3L | 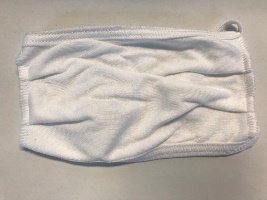 |
| Rozen (Masque 6 ROZEN) | Community face mask | CFM-F-2L | 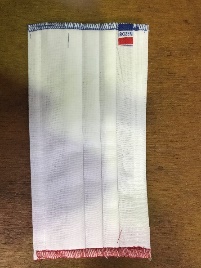 |
| Champion (masque de protection) | Community face mask | CFM-G-3L | 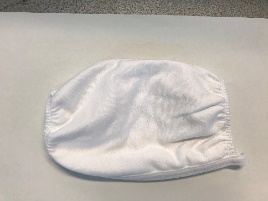 |
| Proneem (VIRAL STOP ®) | Community face mask | CFM-H-2L | 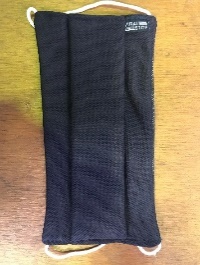 |
| Masque Direct (assortiment fantaisie) | Community face mask | CFM-I-3L | 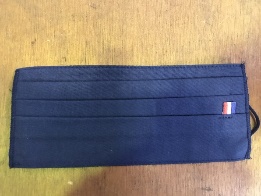 |
| Medimasque (MT-CN) | Community face mask | CFM-J-3L | 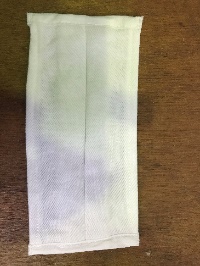 |
| Bioserenity (SKU: 1016-07007-EU) | Medical face mask Type IIR | Medical face mask | 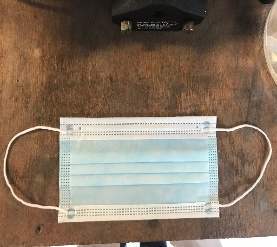 |

**Supplementary Table S1: Medical and community face masks references used in this study. 2L refers to 2 layer masks whilst 3L refers to 3 Layer masks.**

**Supplementary Fig. S1:** **SEM images (200X magnification and scale bar corresponds to 100 μm) of : (a) CFM-A-2L, (b) CFM-B-3L, (c) meltblown layer of the surgical mask; for the new and washed masks subjected to two wash temperatures (30°C and 60°C).**

**
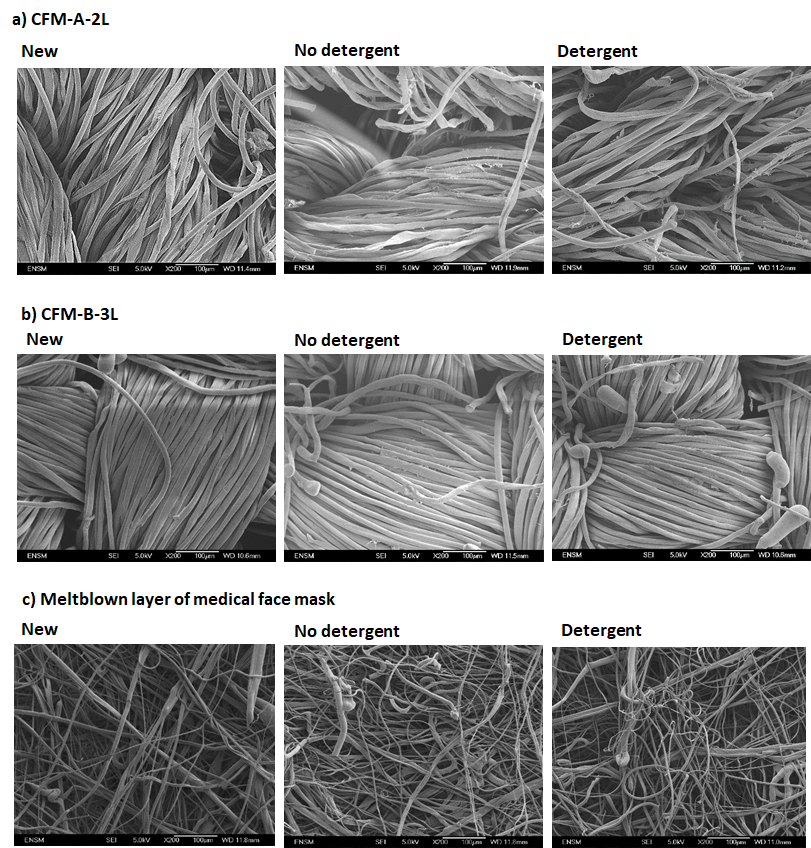
**

**Supplementary Fig. S2: SEM images (200X magnification and scale bar corresponds to 100 μm) of : (a) CFM-A-2L, (b) CFM-B-3L, (c) meltblown layer of the surgical mask; for the new masks and masks washed with and without detergent.**
